# Supplementary material for: Evolutionary interplay between sister cytochrome P450 genes shapes plasticity in plant metabolism
Source: PubMed Central journal article supplement (PMC5059761; doi:10.1038/ncomms13026), 2016-10-07
Supplement: ncomms13026-s1.pdf [file ncomms13026-s1.pdf]

# Supplementary Figures

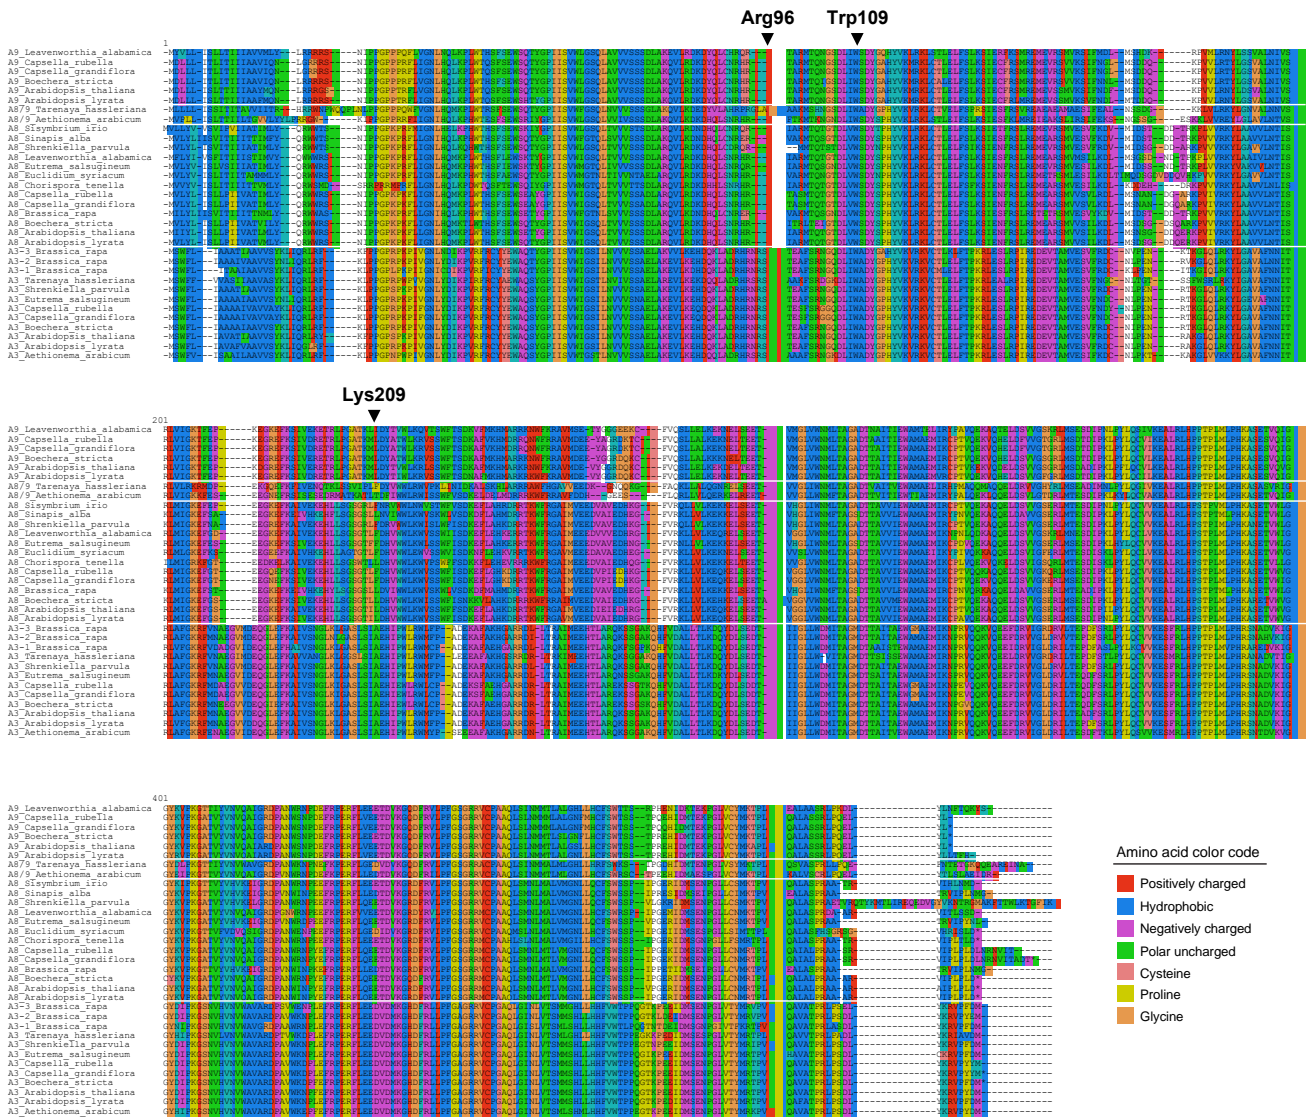

Supplementary Figure 1. *Brassicales* CYP98 protein sequences alignment.

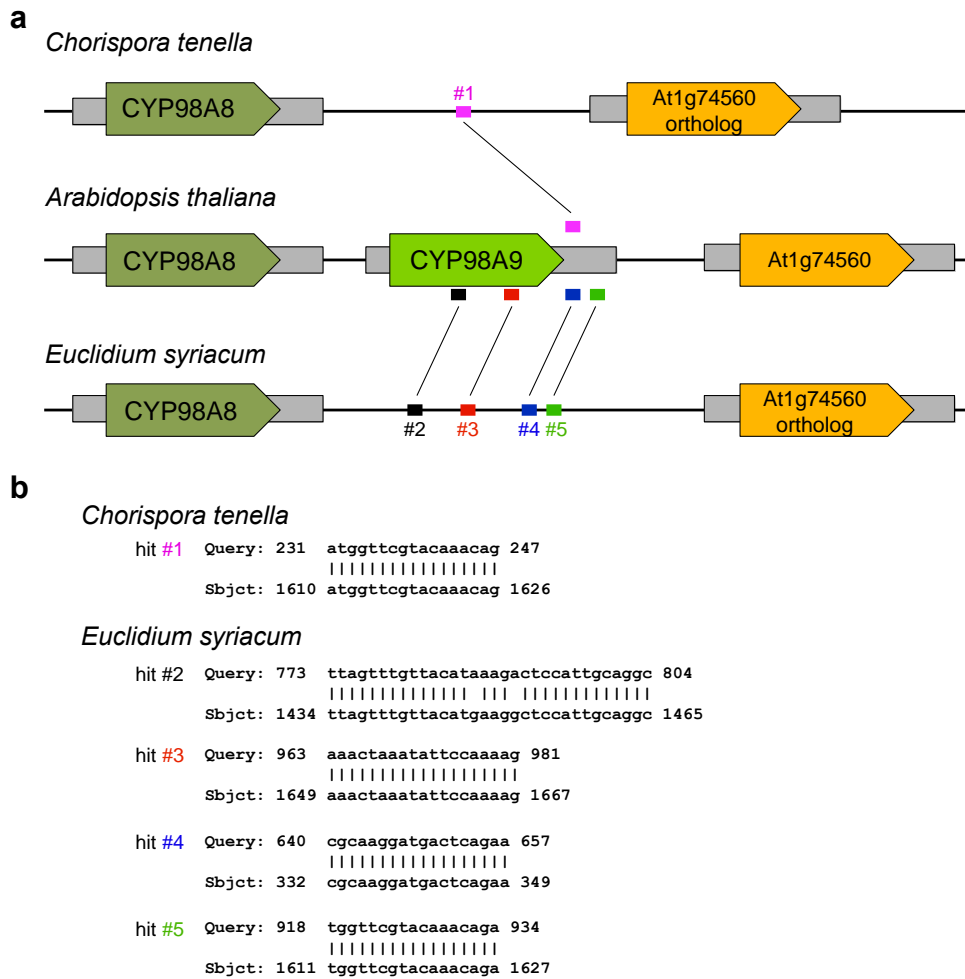

**Supplementary Figure 2. Search for *CYP98A8/A9* homologs in the Brassicaceae lineage III species *Chorispora tenella* and *Euclidium syriacum*.**

BLAST search respectively found one and four correctly ordered remnant *CYP98A9* fragments in *C. tenella* and *E. syriacum*. (a) Schematic view of the *CYP98A8/CYP98A9* genomic region. (b) Details of the BLAST hits. BLAST query consisted of *C. tenella* or *E. syriacum* sequences.

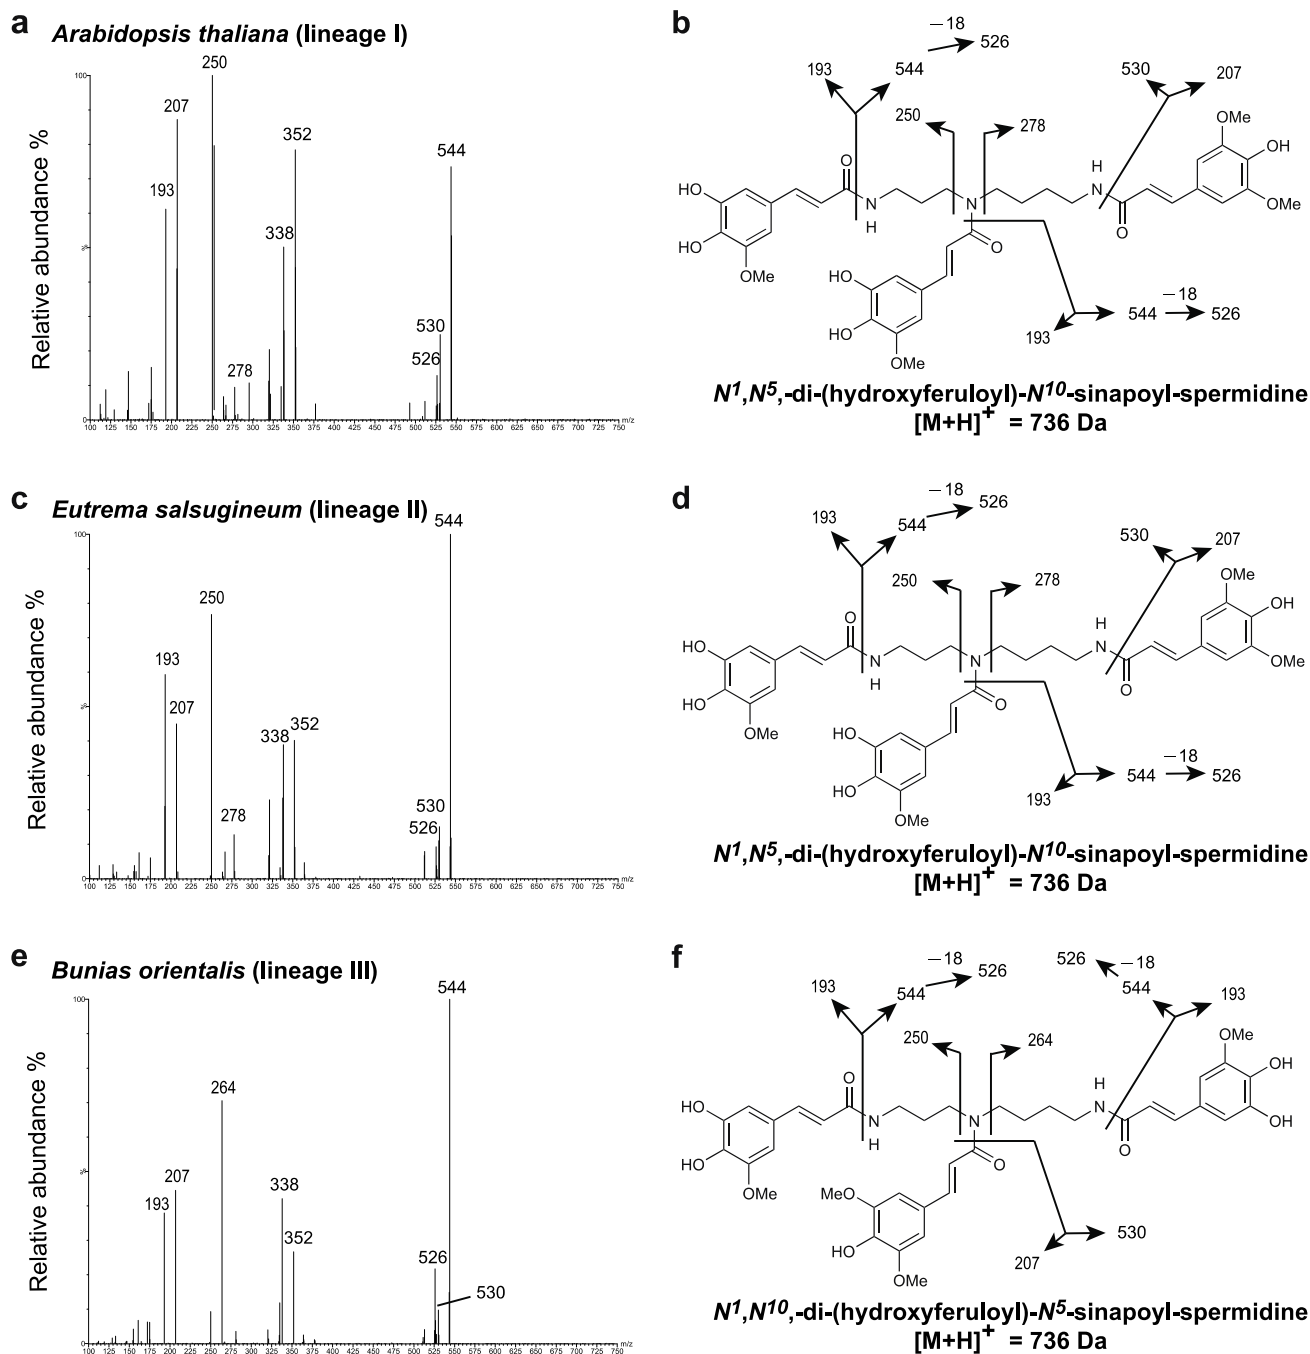

**Supplementary Figure 3. Identification of the sinapoylated phenolamide in *Brassicaceae* lineage I, II and III species.**

Structure of the molecules (*m/z* 736) in **Fig. 1c** was inferred from their fragmentation patterns obtained by daughter scan analysis of flower bud extract. **(a-b)** *Arabidopsis thaliana* **(a)** fragmentation chromatogram and **(b)** deduced fragmentation pattern. **(c-d)** *Eutrema salsugineum* **(c)** fragmentation chromatogram and **(d)** deduced fragmentation pattern. **(e-f)** *Bunias orientalis* **(e)** fragmentation chromatogram and **(f)** deduced fragmentation pattern.

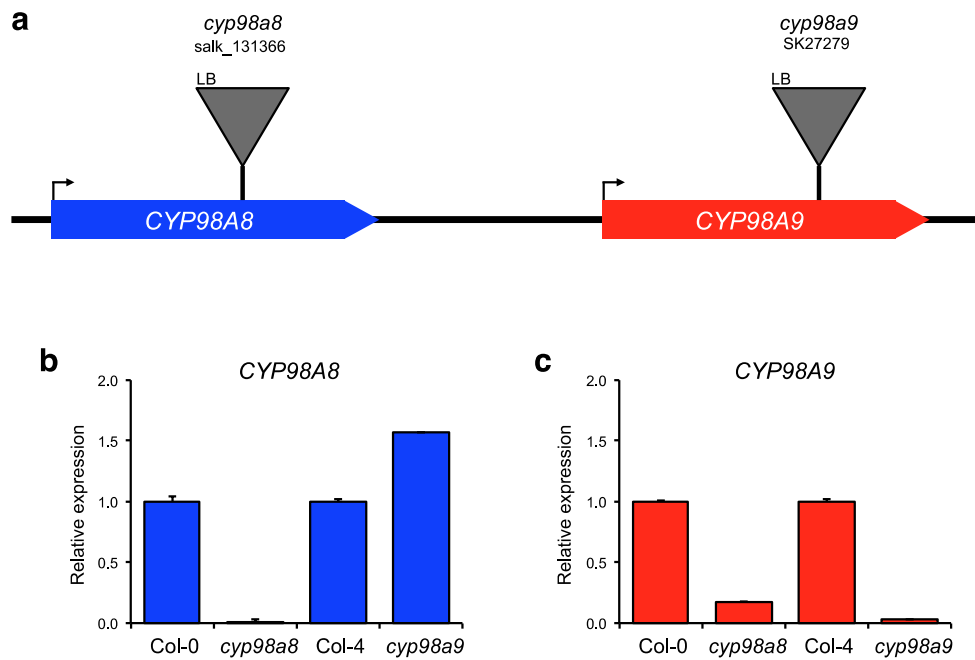

**Supplementary Figure 4. Molecular characterization of *Arabidopsis thaliana* insertion mutant lines.**

(a) Cartoon depicting the *Arabidopsis thaliana* CYP98A8/CYP98A9 loci organization. Expression level analysis of (b) CYP98A8 (blue) and (c) CYP98A9 (red) confirmed that *cyp98a8* (Col-0 background) and *cyp98a9* (Col-4 background) insertion lines are true KO mutants. Note that a decrease in CYP98A9 expression was observed in *cyp98a8* mutant, likely as a result of either a detrimental effect of T-DNA insertion or a negative transcriptional feedback. Results are the mean  $\pm$  SE from three technical replicates.

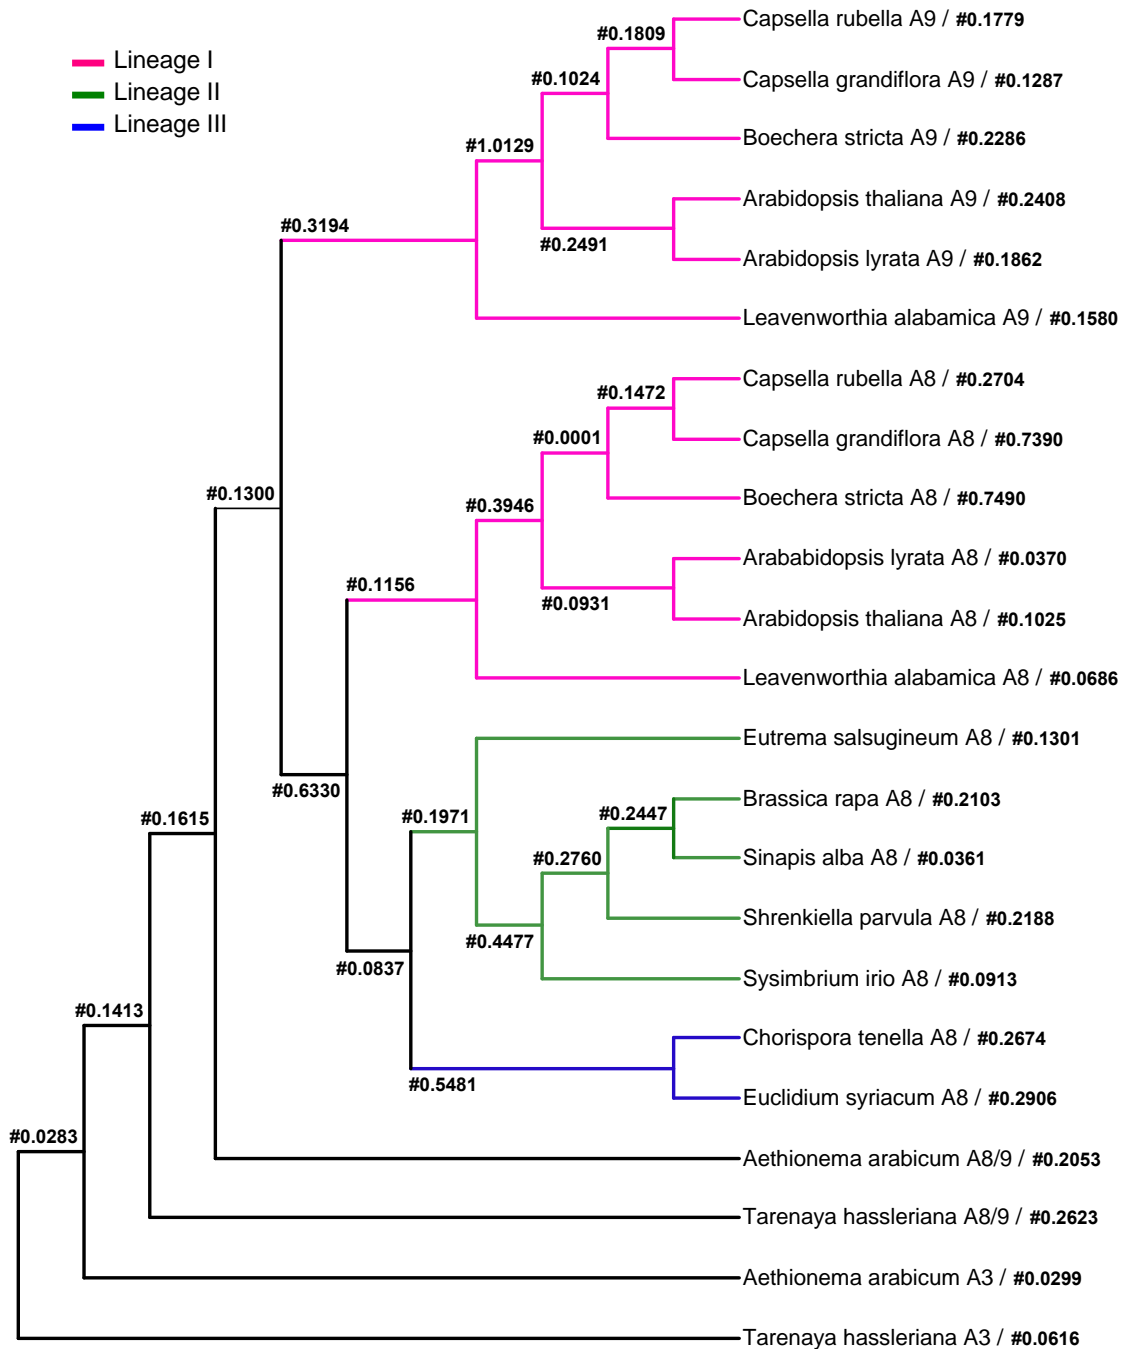

**Supplementary Figure 5. Codeml Free Ratio sub-tree.**

Omega values are indicated in bold next to branches or next to leaves for terminal branches.  $\ln L_0 = -15473.924778$ ;  $\ln L = -13886.83423$ .

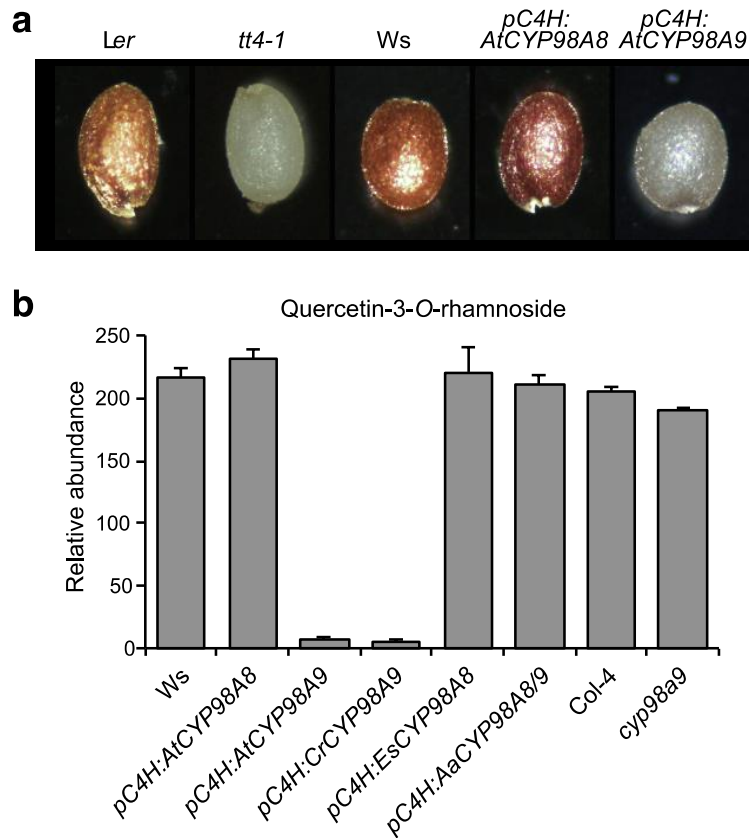

**Supplementary Figure 6. Detection of flavonoids in seeds of the *A. thaliana* transgenic lines.**

(a) Vanillin staining of tannins precursors confirmed the lack of tannins in the *pC4H:AtCYP98A9* line (Ws background) as in the *tt4-1* mutant (Ler background). (b) Profiling of the seed soluble phenolics shows that lineage I *CYP98A9s* ectopic expression only leads to suppression of the major flavonol quercetin-3-O-rhamnoside. Error bars represent the SE from three independent determinations. Aa, *A. arabicum*; At, *A. thaliana*; Cr, *C. rubella*; Es: *E. salsugineum*. Col-4: wild-type Arabidopsis Columbia-4. Ws: wild-type Arabidopsis Wassilewskija.

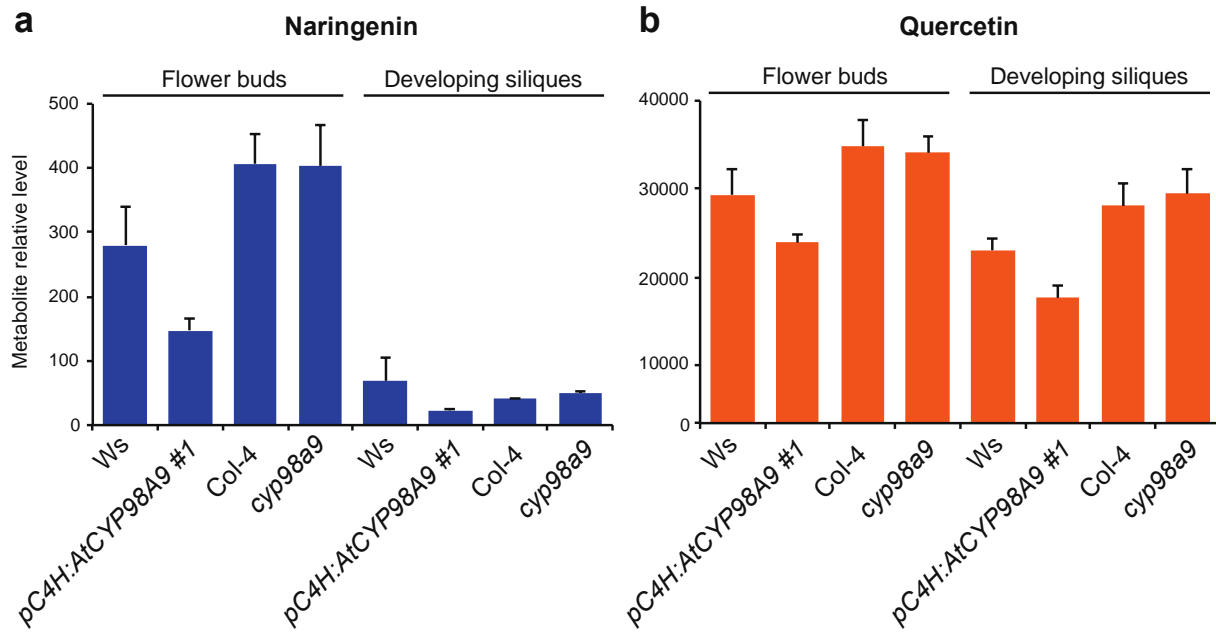

**Supplementary Figure 7. Quantification of naringenin and quercetin aglycones in *A. thaliana* control and *CYP98A9* overexpressor and insertion mutant lines.**

Relative amounts of (a) naringenin (blue) and (b) quercetin (orange) were quantified by LC-MS/MS after acid hydrolysis of extracts from flower buds and developing siliques at the globular seed stage. Error bars represent SE of three independent determinations.

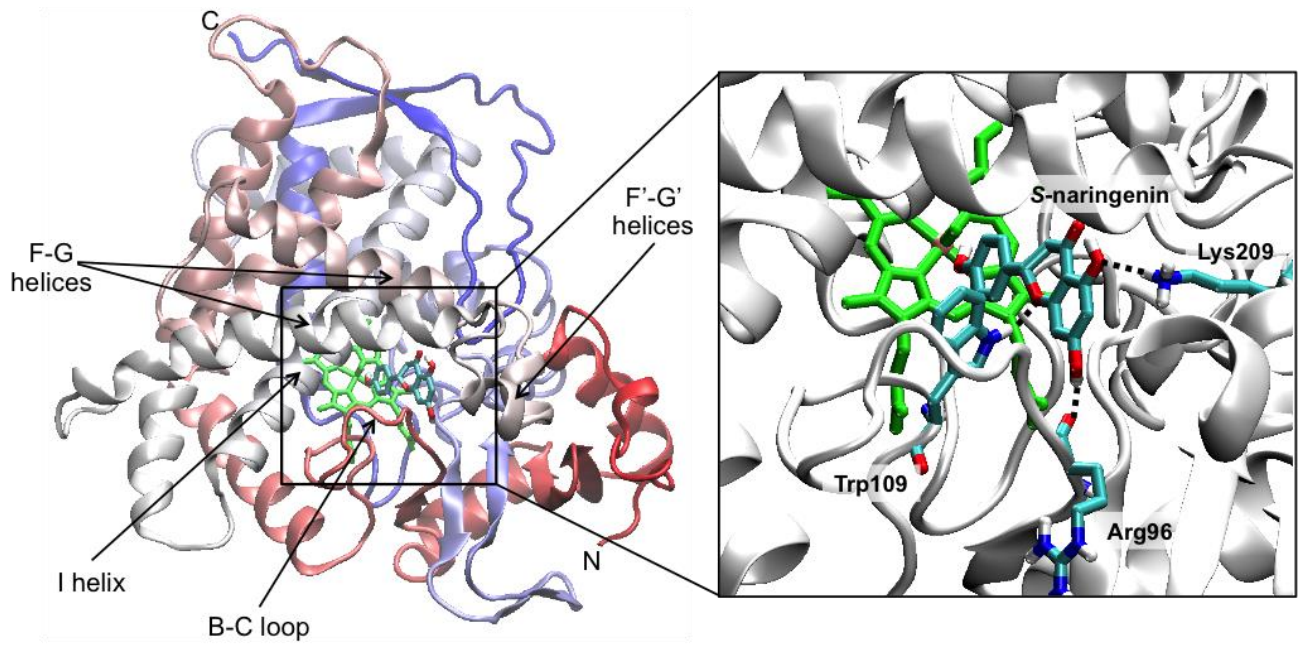

**Supplementary Figure 8. Alternative views of S-naringenin docking in the AtCYP98A9 active site.**



|                            | Arg <sup>96</sup> |     | Trp <sup>109</sup> |     | Lys <sup>209</sup> |     |
|----------------------------|-------------------|-----|--------------------|-----|--------------------|-----|
| A9_Leavenworthia_alabamica | R                 | AGA | W                  | TGG | K                  | AAG |
| A9_Capsella_rubella        | R                 | AGA | W                  | TGG | K                  | AAG |
| A9_Capsella_grandiflora    | R                 | AGA | W                  | TGG | K                  | AAG |
| A9_Boechera_stricta        | R                 | AGA | W                  | TGG | K                  | AAG |
| A9_Arabidopsis_thaliana    | R                 | AGA | W                  | TGG | K                  | AAG |
| A9_Arabidopsis_lyrata      | R                 | AGA | W                  | TGG | K                  | AAG |
| A8/9_Tarenaya_hassleriana  | R                 | CGT | W                  | TGG | P                  | CCG |
| A8/9_Aethionema_arabicum   | R                 | AGA | W                  | TGG | T                  | ACA |
| A8_Sisymbrium_iriio        | R                 | AGG | W                  | TGG | R                  | AGA |
| A8_Sinapis_alba            | R                 | AGG | W                  | TGG | S                  | AGC |
| A8_Shrenkiella_parvula     | R                 | AGG | W                  | TGG | R                  | AGA |
| A8_Leavenworthia_alabamica | R                 | AGG | W                  | TGG | T                  | ACA |
| A8_Eutrema_salsugineum     | R                 | CGC | W                  | TGG | T                  | ACG |
| A8_Euclidium_syriacum      | R                 | AGG | W                  | TGG | T                  | ACG |
| A8_Chorispora_tenella      | R                 | AGG | W                  | TGG | T                  | ACG |
| A8_Capsella_rubella        | R                 | AGG | W                  | TGG | T                  | ACG |
| A8_Capsella_grandiflora    | R                 | AGG | W                  | TGG | T                  | ACG |
| A8_Brassica_rapa           | R                 | AGG | W                  | TGG | S                  | AGC |
| A8_Boechera_stricta        | R                 | AGG | W                  | TGG | T                  | ACG |
| A8_Arabidopsis_thaliana    | R                 | AGG | W                  | TGG | T                  | ACG |
| A8_Arabidopsis_lyrata      | R                 | AGG | W                  | TGG | T                  | ACG |
| A3-3_Brassica_rapa         | R                 | CGG | W                  | TGG | S                  | TCG |
| A3-2_Brassica_rapa         | R                 | CGG | W                  | TGG | S                  | TCG |
| A3-1_Brassica_rapa         | R                 | CGG | W                  | TGG | S                  | TCG |
| A3_Tarenaya_hassleriana    | R                 | CGG | W                  | TGG | S                  | TCA |
| A3_Shrenkiella_parvula     | R                 | CGG | W                  | TGG | S                  | TCG |
| A3_Eutrema_salsugineum     | R                 | CGG | W                  | TGG | S                  | TCG |
| A3_Capsella_rubella        | R                 | CGG | W                  | TGG | S                  | TCG |
| A3_Capsella_grandiflora    | R                 | CGG | W                  | TGG | S                  | TCG |
| A3_Boechera_stricta        | R                 | CGG | W                  | TGG | S                  | TCG |
| A3_Arabidopsis_thaliana    | R                 | CGG | W                  | TGG | S                  | TCA |
| A3_Arabidopsis_lyrata      | R                 | CGG | W                  | TGG | S                  | TCG |
| A3_Aethionema_arabicum     | R                 | CGG | W                  | TGG | S                  | TCG |

**Supplementary Figure 9. Alignments of the AtCYP98A9 Arg<sup>96</sup>, Trp<sup>109</sup> and Lys<sup>209</sup> sites.**

Amino acid and codon alignments for the three CYP98A9 residues identified in S-naringenin docking experiments.

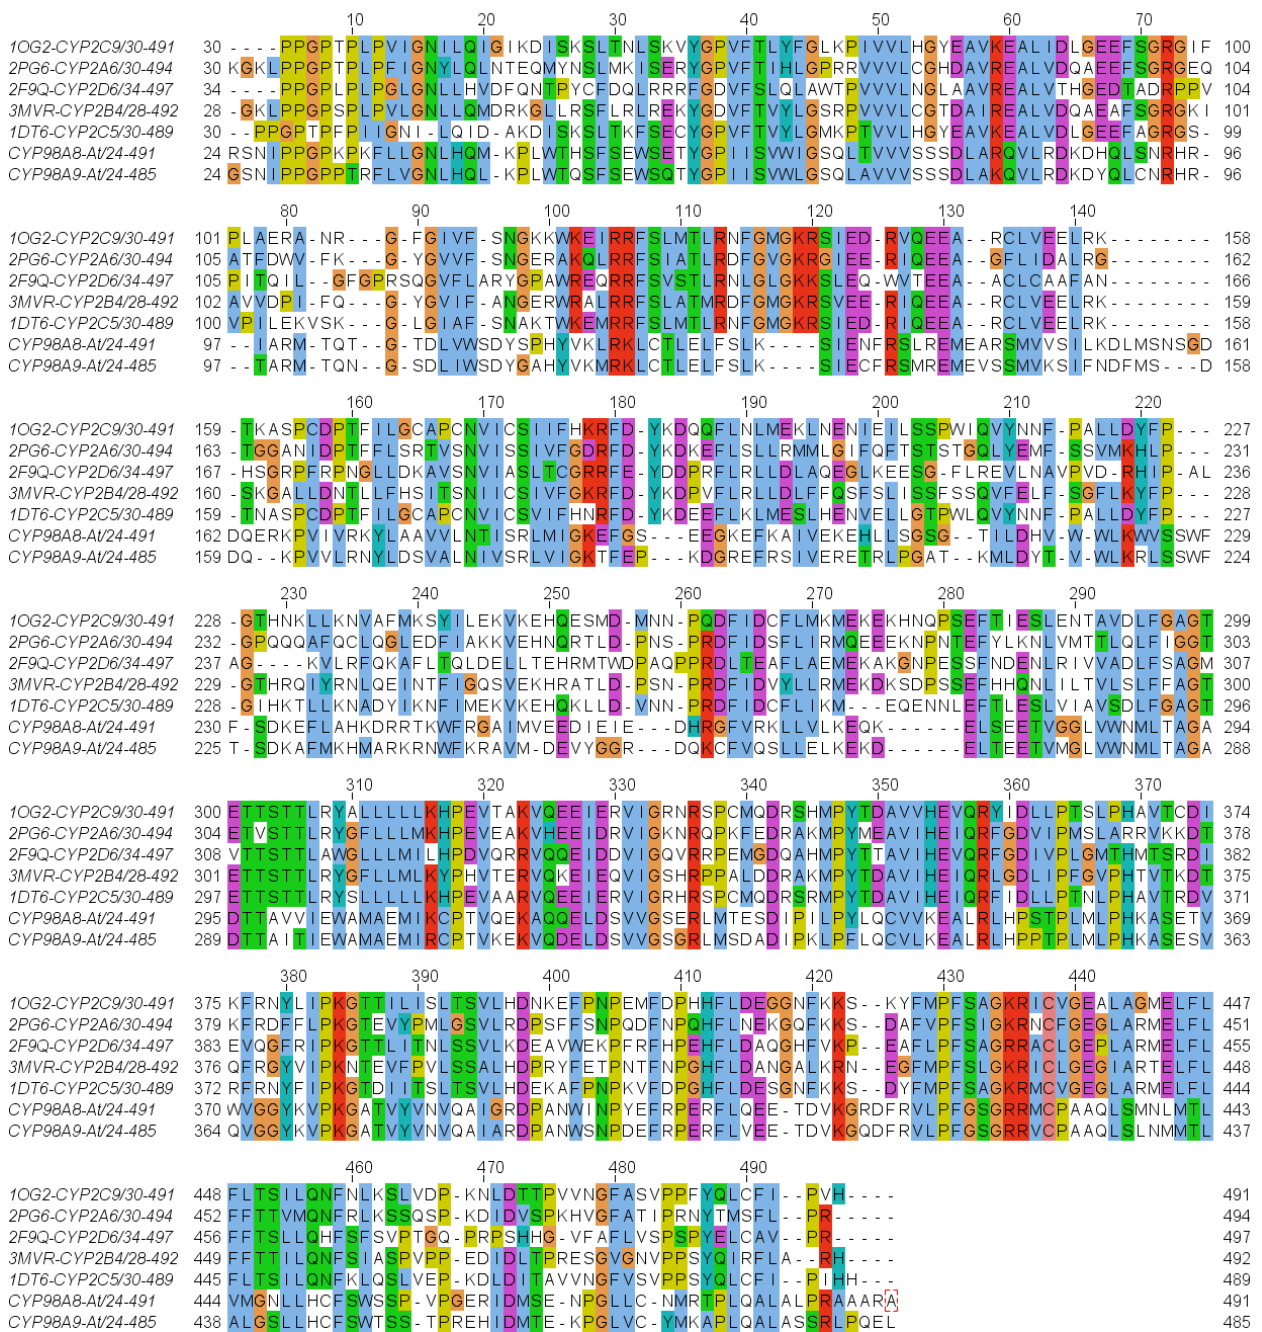

### Supplementary Figure 10. Multiple proteins alignment used as input for homology modeling.

MAFFT (with iterative refinement method L-INS-i) was used to align the following templates: CYP2C9 (PDB 1OG2), CYP2A6 (PDB 2PG6), CYP2D6 (PDB 2F9Q), CYP2B4 (PDB 3MVR), and CYP2C5 (PDB 1DT6), together with the sequences of AtCYP98A8 (starting from Arg 24) and AtCYP98A9 (starting from Gly 24). Resulting alignment was the input for Modeller. The MAFFT-L-INS-i alignment has been corrected and validated by MUSTANG (Multiple Structural Alignment Algorithm).

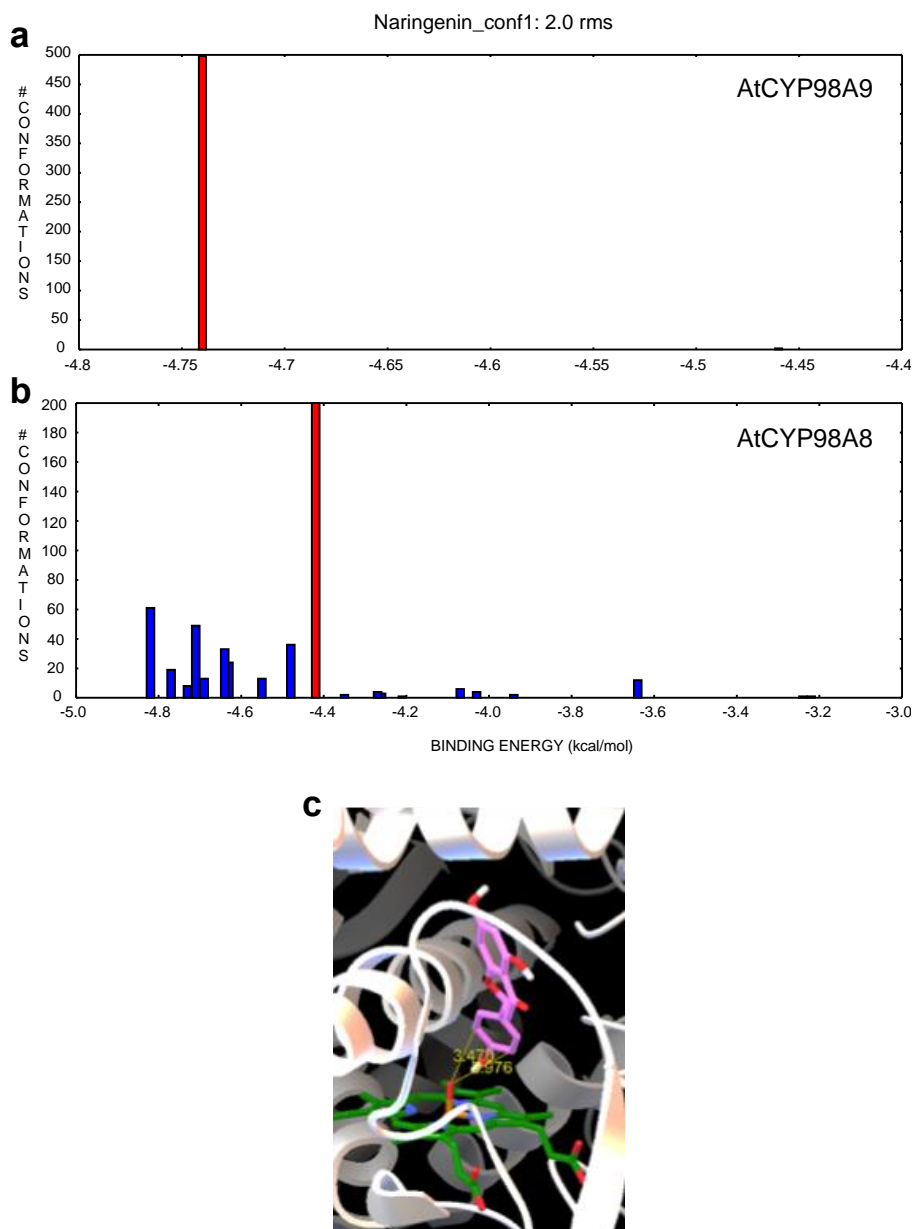

**Supplementary Figure 11. Clustering of 500 docking runs of one starting conformer of S-naringenin.**

Docking was performed with Autodock 4.2.6 on the rebuilt 3D models of AtCYP98A8 and AtCYP98A9 isoforms. The histograms of the docking scores (in kcal/mol) have been generated with RMSD tolerance of 2 Å for clustering. The distribution of poses between the two isoforms revealed highly dissimilar binding modes. The 500 calculated poses are found in an almost unique position (498/500) in **(a)** AtCYP98A9 (binding energy -4.74 kcal/mol, energy range of the cluster 0.7 kcal/mol), contrary to **(b)** AtCYP98A8 isoform, for which the poses are scattered in different orientations, and various positions and regions of the CYP active site, indicating reduced binding specificity. For AtCYP98A8, the lowest energy cluster (-4.73 kcal/mol) contains 61 similar poses of a reverse position of the ligand, with the double ring of naringenin oriented towards the iron-oxo group. The first cluster corresponding to a 3'-OH metabolism pose is found to be the 10<sup>th</sup> (in red, cluster of 200 poses, best binding energy -4.40 kcal/mol, energy range 0.5 kcal/mol), **(c)** with residues Trp109, Ile97 and Ser210 involved in H-bonding with naringenin. For AtCYP98A9, the bound conformation of naringenin is stabilized by Trp<sup>109</sup>, Arg<sup>96</sup>, and Lys<sup>209</sup>, and is found for 498 out of 500 runs of the various naringenin conformers, with the same network of H-bonding interactions (**Fig. 5a**).

## Supplementary Tables

Supplementary Table 1. List of CYP98A sequences ID and sources.

| Sequence name                     | Sequence ID                   | Source      |
|-----------------------------------|-------------------------------|-------------|
| <i>Aethionema arabicum</i> A3     | AA93G00030                    | CoGepedia   |
| <i>Aethionema arabicum</i> A8/9   | AA31G00492                    | CoGepedia   |
| <i>Arabidopsis lyrata</i> A3      | 934902                        | Phytozome   |
| <i>Arabidopsis lyrata</i> A8      | 476592                        | Phytozome   |
| <i>Arabidopsis lyrata</i> A9      | 926836                        | Phytozome   |
| <i>Arabidopsis thaliana</i> A3    | At2g40890                     | Phytozome   |
| <i>Arabidopsis thaliana</i> A8    | At1g74540                     | Phytozome   |
| <i>Arabidopsis thaliana</i> A9    | At1g74550                     | Phytozome   |
| <i>Boechera stricta</i> A3        | Bostr.9345s0043               | Phytozome   |
| <i>Boechera stricta</i> A8        | Bostr.3288s0100               | Phytozome   |
| <i>Boechera stricta</i> A9        | Bostr.3288s0102               | Phytozome   |
| <i>Brassica rapa</i> A3-1         | Bra004591                     | Phytozome   |
| <i>Brassica rapa</i> A3-2         | Bra000211                     | Phytozome   |
| <i>Brassica rapa</i> A3-3         | Bra016964                     | Phytozome   |
| <i>Brassica rapa</i> A8           | Bra003795                     | Phytozome   |
| <i>Capsella grandiflora</i> A3    | Cagra.1642s0055               | Phytozome   |
| <i>Capsella grandiflora</i> A8    | Cagra.0402s0070               | Phytozome   |
| <i>Capsella grandiflora</i> A9    | Cagra.0402s0071               | Phytozome   |
| <i>Capsella rubella</i> A3        | Carubv10023039m               | Phytozome   |
| <i>Capsella rubella</i> A8        | Carubv10020525m               | Phytozome   |
| <i>Capsella rubella</i> A9        | scaffold_2:11600237..11601700 | Phytozome   |
| <i>Chorispora tenella</i> A8      | KX754461                      | This study  |
| <i>Euclidium syriacum</i> A8      | KX754460                      | This study  |
| <i>Eutrema salsugineum</i> A3     | Thhalv10016538m               | Phytozome   |
| <i>Eutrema salsugineum</i> A8     | Thhalv10019844m               | Phytozome   |
| <i>Leavenworthia alabamica</i> A8 | LA_scaffold402_37             | CoGepedia   |
| <i>Leavenworthia alabamica</i> A9 | LA_scaffold810_32             | CoGepedia   |
| <i>Shrenkiella parvula</i> A3     | Tp4g23210                     | CoGepedia   |
| <i>Shrenkiella parvula</i> A8     | Tp5g29720                     | CoGepedia   |
| <i>Sinapis alba</i> A8            | scaffold-VMNH-2088376         | 1kP project |
| <i>Sisymbrium irio</i> A8         | SI_scaffold242_307.mRNA1      | CoGepedia   |
| <i>Tarenaya hassleriana</i> A3    | Th2v28411                     | CoGepedia   |
| <i>Tarenaya hassleriana</i> A8/9  | Th2v10286                     | CoGepedia   |

**Supplementary Table 2. Results of likelihood ratio tests for the different  $d_N/d_S$  models.**

The different  $d_N/d_S$  models were run either on the whole alignment (560 sites for Fitmodel analyses and 457 sites for PAML analyses) or on a trimmed alignment (404 sites, for both Fitmodel and PAML analyses). lnL: likelihood; df: degree of freedom.

|                                    | # parameters | lnL          | df  | p-value  |
|------------------------------------|--------------|--------------|-----|----------|
| <b>457 codons</b>                  |              |              |     |          |
| <b>BranchModel</b>                 |              |              |     |          |
| Test3 (4 ratio)                    |              | -16601.79404 | 1   |          |
| Test4 (4 ratio)                    |              | -16597.59446 | 1   | 3.8E-03  |
| Test5 (5 ratio)/Test4              |              | -16588.56815 | 1   | 2.1E-05  |
| Test5 (5 ratio)/Test3              |              | -16588.56815 | 1   | 2.7E-07  |
| <b>BranchSite</b>                  |              |              |     |          |
| Control2 (A9) fix w2=1             |              | -16526.84164 |     |          |
| Test2 (A9)                         | 4            | -16526.84164 | 1   | 1.0E+00  |
| Control3 (A8LI) fix w2=1           |              | -16542.10764 |     |          |
| Test3 (A8LI)                       | 4            | -16542.03048 | 1   | 6.9E-01  |
| Control4 (A8LII_III) fix w2=1      |              | -16518.81450 |     |          |
| Test4 (A8LII_III)                  | 4            | -16518.81450 | 1   | 1.0E+00  |
| <b>CladeModel</b>                  |              |              |     |          |
| Control (M1a)                      | 2            | -16542.13271 |     |          |
| Test3 (A8 A9)                      | 6            | -16350.08619 | 4   | <10E-308 |
| Test5 (A8LI A9 A8LII_III)          | 7            | -16354.14997 | 5   | <10E-308 |
| Test6 (A8LI+A9 A8LII_III)          | 6            | -16361.85583 | 4   | <10E-308 |
| Test5 (A8LI A9 A8LII_III) / Test 3 | 7            | -16354.14997 | 1   | 4.4E-03  |
| Test5 (A8LI A9 A8LII_III) / Test 6 | 7            | -16354.14997 | 1   | 8.6E-05  |
| <b>560 codons</b>                  |              |              |     |          |
| <b>FitModel</b>                    |              |              |     |          |
| M2a No Switch                      |              | -19047.68739 |     |          |
| MX                                 |              | -18853.12377 | 0/1 | <10E-308 |
| M2a                                |              | -18800.81296 | 0/1 | <10E-308 |
| <b>404 codons</b>                  |              |              |     |          |
| <b>BranchModel</b>                 |              |              |     |          |
| Test3 (4 ratio)                    |              | -13993.59631 | 1   |          |
| Test4 (4 ratio)                    |              | -13989.48893 | 1   | 4.2E-03  |
| Test5 (5 ratio)/Test4              |              | -13981.43364 | 1   | 6.0E-05  |
| Test5 (5 ratio)/Test3              |              | -13981.43364 | 1   | 8.1E-07  |
| <b>BranchSite</b>                  |              |              |     |          |
| Control2 (A9) fix w2=1             |              | -13960.19083 |     |          |

|                               |   |              |   |         |
|-------------------------------|---|--------------|---|---------|
| Test2 (A9)                    | 4 | -13960.19083 | 1 | 1.0E+00 |
| Control3 (A8LI) fix w2=1      |   | -13969.62255 |   |         |
| Test3 (A8LI)                  | 4 | -13969.44540 | 1 | 5.5E-01 |
| Control4 (A8LII_III) fix w2=1 |   | -13945.99915 |   |         |
| Test4 (A8LII_III)             | 4 | -13945.99915 | 1 | 1.0E+00 |

### CladeModel

|                                    |   |              |   |          |
|------------------------------------|---|--------------|---|----------|
| Control (M1a)                      | 2 | -13969.86568 |   |          |
| Test3 (A8 A9)                      | 6 | -13804.84842 | 4 | <10E-308 |
| Test5 (A8LI A9 A8LII_III)          | 7 | -13805.06666 | 5 | <10E-308 |
| Test6 (A8LI+A9 A8LII_III)          | 6 | -13811.82391 | 4 | <10E-308 |
| Test3 (A8 A9) / Test1              | 6 | -13804.84842 | 1 |          |
| Test5 (A8LI A9 A8LII_III) / Test 3 | 7 | -13805.06666 | 1 | 5.1E-01  |
| Test5 (A8LI A9 A8LII_III) / Test 6 | 7 | -13805.06666 | 1 | 2.4E-04  |

### FitModel

|               |  |              |     |          |
|---------------|--|--------------|-----|----------|
| M2a No Switch |  | -13889.65632 |     |          |
| MX            |  | -13884.56908 | 0/1 | 7.1E-04  |
| M2a           |  | -13841.69396 | 0/1 | <10E-308 |

---

### Supplementary Table 3. Results of the McDonald-Kreitman (MK) test.

CYP98A9 CDS from 848 *Arabidopsis thaliana* accessions were downloaded from the SALK Institute (<http://signal.salk.edu/atg1001/index.php>). CYP98A9 CDS from *Leavenworthia alabamica* was used as the outgroup. There were 48 alleles in *Arabidopsis thaliana* accessions, which were used to implement a polarized MK using the program DNAsp (<http://www.ub.edu/dnasp/>).

|                                                      |                       |
|------------------------------------------------------|-----------------------|
| ===== McDonald and Kreitman Table =====              |                       |
| <u>Synonymous Substitutions</u>                      |                       |
| Fixed differences between species: 108               | Polymorphic sites: 20 |
| <u>Nonsynonymous Substitutions:</u>                  |                       |
| Fixed differences between species: 90                | Polymorphic sites: 38 |
| Neutrality Index, NI: 2.280                          |                       |
| Alfa value: -1.280                                   |                       |
| Fisher's exact test. P-value (two tailed): 0.010751* |                       |

#### Supplementary Table 4. Gene lists associated with the co-expression networks of AtCYP98A8 and AtCYP98A9.

Lists were obtained with PlaNet (<http://aranet.mpimp-golm.mpg.de/>).

| Locus identifier                            | Gene description                                                                          |
|---------------------------------------------|-------------------------------------------------------------------------------------------|
| <b><i>CYP98A8 co-expression network</i></b> |                                                                                           |
| AT5G60500                                   | Undecaprenyl pyrophosphate synthetase family protein.                                     |
| AT1G06990                                   | GDSL-like Lipase/Acylhydrolase superfamily protein                                        |
| AT2G03740                                   | LEA domain-containing protein                                                             |
| AT1G23250                                   | Caleosin-related family protein                                                           |
| AT3G57620                                   | glyoxal oxidase-related protein                                                           |
| AT1G23600                                   | Domain of unknown function DUF220                                                         |
| AT1G75920                                   | GDSL-like Lipase/Acylhydrolase superfamily protein                                        |
| AT1G30350                                   | Pectin lyase-like superfamily protein                                                     |
| AT1G30020                                   | Protein of unknown function, DUF538                                                       |
| AT3G45480                                   | RING/U-box protein with C6HC-type zinc finger                                             |
| AT2G03850                                   | Late embryogenesis abundant protein (LEA) family protein                                  |
| AT1G06250                                   | alpha/beta-Hydrolases superfamily protein                                                 |
| AT1G33430                                   | Galactosyltransferase family protein                                                      |
| AT3G23770                                   | O-Glycosyl hydrolases family 17 protein                                                   |
| AT1G79780                                   | Uncharacterised protein family (UPF0497)                                                  |
| AT1G02813                                   | Protein of unknown function, DUF538                                                       |
| AT5G07230                                   | Bifunctional inhibitor/lipid-transfer protein/seed storage 2S albumin superfamily protein |
| AT4G14815                                   | Bifunctional inhibitor/lipid-transfer protein/seed storage 2S albumin superfamily protein |
| AT4G29250                                   | HXXXD-type acyl-transferase family protein                                                |
| AT1G23590                                   | Domain of unknown function DUF220                                                         |
| AT5G48210                                   | unknown protein                                                                           |
| AT1G68875                                   | unknown protein                                                                           |
| AT1G23240                                   | Caleosin-related family protein                                                           |
| AT1G26710                                   | unknown protein;.                                                                         |
| AT2G42180                                   | unknown protein                                                                           |
| AT5G16920                                   | Fasciclin-like arabinogalactan family protein                                             |
| AT1G28375                                   | unknown protein                                                                           |
| AT4G30040                                   | Eukaryotic aspartyl protease family protein                                               |
| AT1G20150                                   | Subtilisin-like serine endopeptidase family protein                                       |
| AT1G23520                                   | Domain of unknown function (DUF220)                                                       |
| AT1G23570                                   | Domain of unknown function (DUF220)                                                       |
| AT1G66850                                   | Bifunctional inhibitor/lipid-transfer protein/seed storage 2S albumin superfamily protein |
| AT5G60510                                   | Undecaprenyl pyrophosphate synthetase family protein                                      |
| AT1G06170                                   | basic helix-loop-helix (bHLH) DNA-binding superfamily protein                             |
| AT5G13380                                   | Auxin-responsive GH3 family protein                                                       |



---

|           |                                                                                           |
|-----------|-------------------------------------------------------------------------------------------|
| AT2G18420 | Encodes a Gibberellin-regulated GASA/GAST/Snakin family protein                           |
| AT1G23670 | Domain of unknown function (DUF220)                                                       |
| AT5G62080 | Bifunctional inhibitor/lipid-transfer protein/seed storage 2S albumin superfamily protein |
| AT1G36150 | Bifunctional inhibitor/lipid-transfer protein/seed storage 2S albumin superfamily         |
| AT1G23580 | Domain of unknown function DUF220                                                         |
| AT5G61605 | unknown protein                                                                           |
| AT1G06260 | Cysteine proteinases superfamily protein                                                  |
| AT1G01280 | "CYTOCHROME P450, FAMILY 703, SUBFAMILY A, POLYPEPTIDE 2" (CYP703A2)                      |
| AT1G07340 | SUGAR TRANSPORTER 2 (STP2)                                                                |
| AT1G08065 | ALPHA CARBONIC ANHYDRASE 5 (ACA5)                                                         |
| AT1G13140 | "CYTOCHROME P450, FAMILY 86, SUBFAMILY C, POLYPEPTIDE 3" (CYP86C3)                        |
| AT1G13150 | "CYTOCHROME P450, FAMILY 86, SUBFAMILY C, POLYPEPTIDE 4" (CYP86C4)                        |
| AT1G15460 | REQUIRES HIGH BORON 4 (BOR4)                                                              |
| AT1G26780 | MYB DOMAIN PROTEIN 117 (MYB117)                                                           |
| AT1G28430 | "CYTOCHROME P450, FAMILY 705, SUBFAMILY A, POLYPEPTIDE 24" (CYP705A24)                    |
| AT1G56360 | PURPLE ACID PHOSPHATASE 6 (PAP6)                                                          |
| AT1G61070 | LOW-MOLECULAR-WEIGHT CYSTEINE-RICH 66 (LCR66)                                             |
| AT1G61110 | NAC DOMAIN CONTAINING PROTEIN 25 (NAC025)                                                 |
| AT1G67990 | TAPETUM-SPECIFIC METHYLTRANSFERASE 1 (ATTSM1)                                             |
| AT1G69500 | "CYTOCHROME P450, FAMILY 704, SUBFAMILY B, POLYPEPTIDE 1" (CYP704B1)                      |
| AT1G71160 | 3-KETOACYL-COA SYNTHASE 7 (KCS7)                                                          |
| AT1G74540 | CYTOCHROME P450, FAMILY 98, SUBFAMILY A, POLYPEPTIDE 8 (CYP98A8)                          |
| AT1G74550 | CYTOCHROME P450, FAMILY 98, SUBFAMILY A, POLYPEPTIDE 9 (CYP98A9)                          |
| AT1G75790 | SKU5 SIMILAR 18 (sks18)                                                                   |
| AT1G75910 | EXTRACELLULAR LIPASE 4 (EXL4)                                                             |
| AT1G75930 | EXTRACELLULAR LIPASE 6 (EXL6)                                                             |
| AT1G75940 | BETA GLUCOSIDASE 20 (BGLU20)                                                              |
| AT2G19070 | SPERMIDINE HYDROXYCINAMOYL TRANSFERASE (SHT)                                              |
| AT2G23800 | GERANYLGERANYL PYROPHOSPHATE SYNTHASE 2 (GGPS2)                                           |
| AT3G06100 | NOD26-LIKE INTRINSIC PROTEIN 7;1 (NIP7;1)                                                 |
| AT3G11980 | MALE STERILITY 2 (MS2)                                                                    |
| AT3G13220 | ATP-BINDING CASSETTE G26 (ABCG26)                                                         |
| AT3G15400 | ANTHER 20 (ATA20)                                                                         |
| AT3G25050 | XYLOGLUCAN ENDOTRANSGLUCOSYLASE/HYDROLASE 3 (XTH3)                                        |
| AT3G42960 | TAPETUM 1 (ATA1)                                                                          |
| AT3G51590 | LIPID TRANSFER PROTEIN 12 (LTP12)                                                         |
| AT3G52160 | 3-KETOACYL-COA SYNTHASE 15 (KCS15)                                                        |
| AT3G52810 | PURPLE ACID PHOSPHATASE 21 (PAP21)                                                        |
| AT4G14080 | MATERNAL EFFECT EMBRYO ARREST 48 (MEE48)                                                  |
| AT4G27330 | SPOROCYTELESS (SPL)                                                                       |

---

---

|           |                                    |
|-----------|------------------------------------|
| AT4G28090 | SKU5 SIMILAR 10 (sks10)            |
| AT4G28395 | ANTHER 7 (A7)                      |
| AT4G34850 | LESS ADHESIVE POLLEN 5 (LAP5)      |
| AT5G07510 | GLYCINE-RICH PROTEIN 14 (GRP14)    |
| AT5G07520 | GLYCINE-RICH PROTEIN 18 (GRP18)    |
| AT5G07530 | GLYCINE RICH PROTEIN 17 (GRP17)    |
| AT5G07540 | GLYCINE-RICH PROTEIN 16 (GRP16)    |
| AT5G07550 | GLYCINE-RICH PROTEIN 19 (GRP19)    |
| AT5G07560 | GLYCINE-RICH PROTEIN 20 (GRP20)    |
| AT5G49070 | 3-KETOACYL-COA SYNTHASE 21 (KCS21) |
| AT5G53190 | SWEET3                             |
| AT5G62320 | MYB DOMAIN PROTEIN 99 (MYB99)      |

***CYP98A9 co-expression network – Cluster A***

|           |                                                                                           |
|-----------|-------------------------------------------------------------------------------------------|
| AT5G60500 | Undecaprenyl pyrophosphate synthetase family protein.                                     |
| AT5G60500 | Undecaprenyl pyrophosphate synthetase family protein                                      |
| AT1G06990 | GDSL-like Lipase/Acylhydrolase superfamily protein                                        |
| AT1G68875 | unknown protein                                                                           |
| AT1G23240 | Caleosin-related family protein                                                           |
| AT5G52160 | Bifunctional inhibitor/lipid-transfer protein/seed storage 2S albumin superfamily protein |
| AT3G23840 | HXXXD-type acyl-transferase family protein                                                |
| AT2G03740 | late embryogenesis abundant domain-containing protein / LEA domain-containing protein     |
| AT1G23250 | Caleosin-related family protein                                                           |
| AT1G23600 | Domain of unknown function DUF22                                                          |
| AT1G30350 | Pectin lyase-like superfamily protein                                                     |
| AT1G23520 | Domain of unknown function (DUF220                                                        |
| AT1G30020 | Protein of unknown function, DUF538                                                       |
| AT1G23570 | Domain of unknown function (DUF220)                                                       |
| AT3G45480 | RING/U-box protein with C6HC-type zinc finger                                             |
| AT1G06250 | alpha/beta-Hydrolases superfamily protein                                                 |
| AT1G33430 | Galactosyltransferase family protein                                                      |
| AT1G06170 | basic helix-loop-helix (bHLH) DNA-binding superfamily protein                             |
| AT5G60510 | Undecaprenyl pyrophosphate synthetase family protein                                      |
| AT1G79780 | Uncharacterised protein family (UPF0497)                                                  |
| AT3G23770 | O-Glycosyl hydrolases family 17 protein                                                   |
| AT2G18420 | Encodes a Gibberellin-regulated GASA/GAST/Snakin family protein                           |
| AT3G42850 | Mevalonate/galactokinase family protein                                                   |
| AT1G23580 | Domain of unknown function DUF220                                                         |
| AT5G61605 | unknown protein                                                                           |
| AT1G06260 | Cysteine proteinases superfamily protein                                                  |
| AT1G23690 | Domain of unknown function DUF22                                                          |

---

---

|           |                                                                        |
|-----------|------------------------------------------------------------------------|
| AT1G01280 | "CYTOCHROME P450, FAMILY 703, SUBFAMILY A, POLYPEPTIDE 2" (CYP703A2)   |
| AT1G28430 | "CYTOCHROME P450, FAMILY 705, SUBFAMILY A, POLYPEPTIDE 24" (CYP705A24) |
| AT1G13140 | "CYTOCHROME P450, FAMILY 86, SUBFAMILY C, POLYPEPTIDE 3" (CYP86C3)     |
| AT1G13150 | "CYTOCHROME P450, FAMILY 86, SUBFAMILY C, POLYPEPTIDE 4" (CYP86C4)     |
| AT3G52160 | 3-KETOACYL-COA SYNTHASE 15 (KCS15)                                     |
| AT1G71160 | 3-KETOACYL-COA SYNTHASE 7 (KCS7)                                       |
| AT2G16910 | ABORTED MICROSPORES (AMS)                                              |
| AT1G08065 | ALPHA CARBONIC ANHYDRASE 5 (ACA5)                                      |
| AT4G28700 | AMMONIUM TRANSPORTER 1;4 (AMT1;4)                                      |
| AT3G26940 | CONSTITUTIVE DIFFERENTIAL GROWTH 1 (CDG1)                              |
| AT1G74540 | CYTOCHROME P450, FAMILY 98, SUBFAMILY A, POLYPEPTIDE 8 (CYP98A8)       |
| AT2G23800 | GERANYLGERANYL PYROPHOSPHATE SYNTHASE 2 (GGPS2)                        |
| AT5G07530 | GLYCINE RICH PROTEIN 17 (GRP17)                                        |
| AT5G07510 | GLYCINE-RICH PROTEIN 14 (GRP14)                                        |
| AT5G07540 | GLYCINE-RICH PROTEIN 16 (GRP16)                                        |
| AT5G07520 | GLYCINE-RICH PROTEIN 18 (GRP18)                                        |
| AT1G61070 | LOW-MOLECULAR-WEIGHT CYSTEINE-RICH 66 (LCR66)                          |
| AT5G53510 | OLIGOPEPTIDE TRANSPORTER 9 (OPT9)                                      |
| AT3G52810 | PURPLE ACID PHOSPHATASE 21 (PAP21)                                     |
| AT5G36150 | PUTATIVE PENTACYCLIC TRITERPENE SYNTHASE 3 (PEN3)                      |
| AT5G55590 | QUARTET 1 (QRT1)                                                       |
| AT2G19070 | SPERMIDINE HYDROXYCINNAMOYL TRANSFERASE (SHT)                          |
| AT3G42960 | TAPETUM 1 (ATA1)                                                       |

#### ***CYP98A9 co-expression network – Cluster B***

|           |                                                                         |
|-----------|-------------------------------------------------------------------------|
| AT5G60500 | Undecaprenyl pyrophosphate synthetase family protein.                   |
| AT5G12460 | Protein of unknown function (DUF604)                                    |
| AT5G13600 | Phototropic-responsive NPH3 family protein                              |
| AT5G07260 | START (StAR-related lipid-transfer) lipid-binding domain                |
| AT5G03810 | GDSL-like Lipase/Acylhydrolase family protein                           |
| AT1G04380 | encodes a protein similar to a 2-oxoglutarate-dependent dioxygenase     |
| AT3G02590 | Fatty acid hydroxylase superfamily protein                              |
| AT1G50650 | Stigma-specific Stig1 family protein                                    |
| AT1G69860 | Major facilitator superfamily protein                                   |
| AT1G23510 | unknown protein                                                         |
| AT5G03820 | GDSL-like Lipase/Acylhydrolase family protein                           |
| AT4G10490 | 2-oxoglutarate (2OG) and Fe(II)-dependent oxygenase superfamily protein |
| AT4G33600 | unknown protein                                                         |
| AT2G14690 | Encodes a putative glycosyl hydrolase family 10 protein (xylanase).     |
| AT3G46240 | Receptor protein kinase-related                                         |
| AT3G29300 | unknown protein                                                         |

---

---

|           |                                                                                           |
|-----------|-------------------------------------------------------------------------------------------|
| AT3G18180 | Glycosyltransferase family 61 protein                                                     |
| AT5G38180 | Bifunctional inhibitor/lipid-transfer protein/seed storage 2S albumin superfamily protein |
| AT1G64800 | Sequence-specific DNA binding transcription factors                                       |
| AT3G11180 | 2-oxoglutarate (2OG) and Fe(II)-dependent oxygenase superfamily protein                   |
| AT1G54955 | unknown protein                                                                           |
| AT1G71250 | GDSL-like Lipase/Acylhydrolase superfamily protein                                        |
| AT3G20950 | "CYTOCHROME P450, FAMILY 705, SUBFAMILY A, POLYPEPTIDE 32" (CYP705A32)                    |
| AT3G52970 | "CYTOCHROME P450, FAMILY 76, SUBFAMILY G, POLYPEPTIDE 1" (CYP76G1)                        |
| AT1G62340 | ABNORMAL LEAF-SHAPE 1 (ALE1)                                                              |
| AT5G27200 | ACYL CARRIER PROTEIN 5 (ACP5)                                                             |
| AT5G10220 | ANNEXIN 6 (ANN6)                                                                          |
| AT3G58740 | CITRATE SYNTHASE 1 (CSY1)                                                                 |
| AT5G24900 | CYTOCHROME P450, FAMILY 714, SUBFAMILY A, POLYPEPTIDE 2 (CYP714A2)                        |
| AT5G57920 | EARLY NODULIN-LIKE PROTEIN 10 (ENODL10)                                                   |
| AT4G28365 | EARLY NODULIN-LIKE PROTEIN 3 (ENODL3)                                                     |
| AT4G32490 | EARLY NODULIN-LIKE PROTEIN 4 (ENODL4)                                                     |
| AT1G71120 | GDSL-MOTIF LIPASE/HYDROLASE 6 (GLIP6)                                                     |
| AT4G10640 | IQ-DOMAIN 16 (IQD16)                                                                      |
| AT3G27785 | MYB DOMAIN PROTEIN 118 (MYB118)                                                           |
| AT3G19050 | PHRAGMOPLAST ORIENTING KINESIN 2 (POK2)                                                   |
| AT4G33330 | PLANT GLYCOGENIN-LIKE STARCH INITIATION PROTEIN 3 (PGSIP3)                                |
| AT3G08900 | REVERSIBLY GLYCOSYLATED POLYPEPTIDE 3 (RGP3)                                              |
| AT1G14750 | SOLO DANCERS (SDS)                                                                        |
| AT5G59590 | UDP-GLUCOSYL TRANSFERASE 76E2 (UGT76E2)                                                   |

---

**Supplementary Table 5. *A. thaliana* seed flavonols profiling in transgenic lines.**

Flavonols relative amounts in seeds of *pC4H:AtCYP98A8* and *pC4H:AtCYP98A9* lines were determined by UPLC-MS/MS. For transgenic lines, results are the mean  $\pm$  SE of measurements made on seeds samples from three independent lines. For wild type (Ws), results are the mean  $\pm$  SE of measurements made on three independent seeds samples. n.d., not detected; Rha, rhamnoside; Glu, glucoside.

| <b><i>A. thaliana</i> flavonols</b> | <b>Ws</b>       | <b><i>pC4H:AtCYP98A8</i></b> | <b><i>pC4H:AtCYP98A9</i></b> |
|-------------------------------------|-----------------|------------------------------|------------------------------|
| Kaempferol-3-O-Rha                  | 0.15 $\pm$ 0.07 | 0.30 $\pm$ 0.02              | n.d.                         |
| Kaempferol-3-O-Glu-7-O-Rha          | 2.94 $\pm$ 0.62 | 2.12 $\pm$ 0.06              | 2.03 $\pm$ 0.10              |
| Kaempferol-3-O-Rha-7-O-Rha          | 2.40 $\pm$ 0.37 | 1.90 $\pm$ 0.05              | 1.78 $\pm$ 0.13              |
| Quercetin-3-O-Rha                   | 9.54 $\pm$ 0.97 | 15.45 $\pm$ 0.58             | 0.30 $\pm$ 0.05              |
| Quercetin-3-O-Glu-7-O-Rha           | 5.27 $\pm$ 0.93 | 2.50 $\pm$ 0.19              | 3.09 $\pm$ 0.18              |
| Quercetin-3-O-Rha-7-O-Rha           | 5.35 $\pm$ 0.43 | 3.57 $\pm$ 0.13              | 2.96 $\pm$ 0.09              |
| Isorhamnetin-3-O-Rha                | 0.71 $\pm$ 0.12 | 0.68 $\pm$ 0.06              | 0.15 $\pm$ 0.03              |
| Isorhamnetin-3-O-Glu-7-O-Rha        | 2.11 $\pm$ 0.44 | 1.02 $\pm$ 0.03              | 1.76 $\pm$ 0.03              |
| Isorhamnetin-3-O-Rha-7-O-Rha        | 1.38 $\pm$ 0.25 | 0.76 $\pm$ 0.05              | 0.89 $\pm$ 0.02              |

## Supplementary Table 6. List of primers used in the study.

Gateway attB and USER sequences are underlined.

| Primer name                                                                    | Sequence (5' > 3')                                                    |
|--------------------------------------------------------------------------------|-----------------------------------------------------------------------|
| <b><i>T-DNA mutant genotyping</i></b>                                          |                                                                       |
| cyp98a9_KO_LP                                                                  | GACGATGACGATGAAGAGGAG                                                 |
| cyp98a9_KO_RP                                                                  | <u>TTACACCGTTTGGCTTAAACG</u>                                          |
| SK_T-DNA                                                                       | ATACGACGGATCGTAATTTGTCTG                                              |
| <b><i>qPCR analysis</i></b>                                                    |                                                                       |
| AtCYP98A8_qPCR_F                                                               | GCCATCGTTGAGAAAAGAACATCTT                                             |
| AtCYP98A8_qPCR_R                                                               | AACCCATTTGAGCCACCAGAC                                                 |
| AtCYP98A9_qPCR_F                                                               | CACCGTTTGGCTTAAAC                                                     |
| AtCYP98A9_qPCR_R                                                               | CCGAGCCATGTGCTTCAT                                                    |
| AtSAND_qPCR_F                                                                  | AACTCTTATGCAGCATTTGATCCACT                                            |
| AtSAND_qPCR_R                                                                  | TGATTGCATATCTTTATCGCCATC                                              |
| <b><i>CDS gateway cloning</i></b>                                              |                                                                       |
| AtCYP98A8_AttB1                                                                | GGGG <u>ACAAGTTTGTACA</u> AAAAAAGCAGGCTTCATGATTATATATCTAATTTCTACTCCCT |
| AtCYP98A8_AttB2                                                                | GGGG <u>ACCAC</u> TTTGTACAAGAAAGCTGGGTCTTAATCTAAAGGTAAAGGTATTGCTC     |
| AtCYP98A9_AttB1                                                                | GGGG <u>ACAAGTTTGTACA</u> AAAAAAGCAGGCTTCATGGATTTACTCATATCCTTAACC     |
| AtCYP98A9_AttB2                                                                | GGGG <u>ACCAC</u> TTTGTACAAGAAAGCTGGGTCTTAAAGGTATAACTCTTGTTGGCAG      |
| CrCYP98A9_AttB1                                                                | GGGG <u>ACAAGTTTGTACA</u> AAAAAAGCAGGCTTCATGGATTTACTGATTACAC          |
| CrCYP98A9_AttB2                                                                | GGGG <u>ACCAC</u> TTTGTACAAGAAAGCTGGGTCTTAAAGGTATAACTCTTGTTGGC        |
| EsCYP98A8_AttB1                                                                | GGGG <u>ACAAGTTTGTACA</u> AAAAAAGCAGGCTTCATGGTTCTATATGTAATTTCTC       |
| EsCYP98A8_AttB2                                                                | GGGG <u>ACCAC</u> TTTGTACAAGAAAGCTGGGTCTCACAAGTTATAAGGTATAAC          |
| AaCYP98A8/9_AttB1                                                              | GGGG <u>ACAAGTTTGTACA</u> AAAAAAGCAGGCTTCATGGTTCCACTACTGATTTCCG       |
| AaCYP98A8/9_AttB2                                                              | GGGG <u>ACCAC</u> TTTGTACAAGAAAGCTGGGTCTTACCTATCTATTTCCAGCTAAAC       |
| <b><i>CDS USER cloning</i></b>                                                 |                                                                       |
| EsCYP98A8U_F                                                                   | <u>GGCTTAAU</u> ATGTTCTATATGTAATTTCTC                                 |
| EsCYP98A8U_R                                                                   | <u>GGTTTAAU</u> TCACAAGTTATAAGGTATAAC                                 |
| AaCYP98A8/9U_F                                                                 | <u>GGCTTAAU</u> ATGTTCCACTACTGATTTCCGCTAAC                            |
| AaCYP98A8/9U_F                                                                 | <u>GGTTTAAU</u> TTACCTATCTATTTCCAGCTAAACTTAAAG                        |
| ThCYP98A8/9U_F                                                                 | <u>GGCTTAAU</u> ATGCTCCTGCTGCTTATTTTCATC                              |
| ThCYP98A8/9U_F                                                                 | <u>GGCTTAAU</u> ATGCTCCTGCTGCTTATTTTCATC                              |
| <b><i>Degenerate TAIL PCR (used in combination with LAD primers)</i></b>       |                                                                       |
| CYP_5to3_TAIL_outer_alltaxa                                                    | ATCCAACATACCKCCRGGACC                                                 |
| CYP_5to3_TAIL_inner_alltaxa                                                    | GGYCCHATMATATCDGTRTGG                                                 |
| CYP_3to5_TAIL_outer_alltaxa                                                    | TCCAHGAGAARCAWTGCAAC                                                  |
| CYP_3to5_TAIL_inner_alltaxa                                                    | CYGAYCCRAAHGGAAGAAG                                                   |
| <b><i>Species specific TAIL PCR (used in combination with LAD primers)</i></b> |                                                                       |
| Esyria_TAIL2_5to3_inner                                                        | AGAGTGAGGAAGATGATTGTCCC                                               |

---

|                         |                               |
|-------------------------|-------------------------------|
| Esyria_TAIL2_3to5_outer | GTTTCACATAGTGTGGATTGTAATCGG   |
| Esyria_TAIL2_3to5_inner | CGACCCTGTGTCGGTTAGAC          |
| Ct_TAIL2_5to3_outer     | AGATGTAGCTATGGCGAAAGATTAATG   |
| Ct_TAIL2_5to3_inner     | ATTGCTTAGAATTGAGAACCTCATAACAC |
| Ct_TAIL2_3to5_outer     | AAGTTCGAGGTACAGAGTTTCCGC      |
| Ct_TAIL2_3to5_inner     | CCTTGCGATCCTGTGTCGG           |

***Amplification of species-specific CYP98A8/9 locus***

|               |                        |
|---------------|------------------------|
| Ct_fragment_F | GGGAGTGGGTCATTCGGTTTC  |
| Ct_fragment_R | TGGAAATCTCCTCTTGTCCAGG |
| Es_fragment_F | GCGGCAAGGGTTAAGTGAATG  |
| Es_FullFrag_R | CGTGACGTTTGGTTTTCTGCC  |

---

## Supplementary Note 1

### Detailed results of the $d_N/d_S$ analysis (16 species; 33 sequences)

Whole Alignment (457 codons used in the analysis):

#### PAML

##### Branch Model:

###### Test3:

model=2 NSites=0  
w (dN/dS) for branches:      **wb**    **wf1 (A3)**    **wf2 (A8)**    **wf3 (A9)**  
lnL0 = -18031.432706  
lnL = -16601.794038

###### Test4:

model=2 NSites=0  
w (dN/dS) for branches:      **wb**    **wf1 (A3)**    **wf2 (A8LI+A9)**    **wf3 (A8LII\_III)**  
lnL0 = -18035.691187  
lnL = -16597.594460

###### Test5:

model=2 NSites=0  
**(A8LII\_III)**  
w (dN/dS) for branches:      **wb**    **wf1 (A3)**    **wf2 (A8LI)**    **wf3 (A9)**    **wf4**  
lnL0 = -18043.297535  
lnL = -16588.568145

-----

##### Clade Model:

Control: w0 w1      M1A from site model model=0 NSites=1

dN/dS (w) for site classes (K=2)

###### proportions

p:    0.86775    0.13225  
      **w0**      **w1**  
w:    0.12137    1.00000

lnL0 = -17473.026637  
lnL = -16542.132707

Test3 w0 w1 w2 (A8) w3 (A9)      model=3 NSites=2

dN/dS (w) for site classes (K=3)

| site class     | 0         | 1       | 2              |
|----------------|-----------|---------|----------------|
| proportion     | 0.53672   | 0.01010 | 0.45317        |
|                | <b>w0</b> |         | <b>w1</b>      |
| branch type 0: | 0.03556   | 1.00000 | 0.20660        |
|                | <b>w0</b> |         | <b>w2 (A8)</b> |
| branch type 1: | 0.03556   | 1.00000 | 0.36956        |
|                | <b>w0</b> |         | <b>w3 (A9)</b> |
| branch type 2: | 0.03556   | 1.00000 | 0.42991        |

lnL0 = -17243.101151  
lnL = -16350.086194



**Test6 w0 w1 w2 (A8LI+A9) w3 (A8LII\_III) model=3 NSites=2**

dN/dS (w) for site classes (K=3)

| site class     | 0         | 1       | 2                     |
|----------------|-----------|---------|-----------------------|
| proportion     | 0.54995   | 0.00882 | 0.44124               |
|                | <b>w0</b> |         | <b>w1</b>             |
| branch type 0: | 0.03853   | 1.00000 | 0.23962               |
|                | <b>w0</b> |         | <b>w2 (A8LI+A9)</b>   |
| branch type 1: | 0.03853   | 1.00000 | 0.32450               |
|                | <b>w0</b> |         | <b>w3 (A8LII_III)</b> |
| branch type 2: | 0.03853   | 1.00000 | 0.41842               |

lnL0 = -17243.186246

lnL = -16361.855829

**Test5 w0 w1 w2 (A8LI) w3 (A9) w4 (A8LII\_III) model=3 NSites=2**

dN/dS (w) for site classes (K=3)

| site class     | 0         | 1       | 2                     |
|----------------|-----------|---------|-----------------------|
| proportion     | 0.52184   | 0.01158 | 0.46658               |
|                | <b>w0</b> |         | <b>w1</b>             |
| branch type 0: | 0.03425   | 1.00000 | 0.22857               |
|                | <b>w0</b> |         | <b>w2 (A8LI)</b>      |
| branch type 1: | 0.03425   | 1.00000 | 0.21602               |
|                | <b>w0</b> |         | <b>w3 (A9)</b>        |
| branch type 2: | 0.03425   | 1.00000 | 0.43443               |
|                | <b>w0</b> |         | <b>w4 (A8LII_III)</b> |
| branch type 3: | 0.03425   | 1.00000 | 0.39346               |

lnL0 = -17245.676264

lnL = -16354.149966

-----

**Branch Site:**

**Control M2A model=2 NSites=2 fixed omega=1**

**Control2 A9  
foreground A9**

dN/dS (w) for site classes (K=4)

| site class   | 0       | 1       | 2a      | 2b      |
|--------------|---------|---------|---------|---------|
| proportion   | 0.77134 | 0.11445 | 0.09945 | 0.01476 |
| background w | 0.11295 | 1.00000 | 0.11295 | 1.00000 |
| foreground w | 0.11295 | 1.00000 | 1.00000 | 1.00000 |

lnL0 = -17071.283119

lnL = -16526.841641

**Control3 A8LI  
foreground A8LI**

dN/dS (w) for site classes (K=4)

| site class   | 0       | 1       | 2a      | 2b      |
|--------------|---------|---------|---------|---------|
| proportion   | 0.86624 | 0.13124 | 0.00219 | 0.00033 |
| background w | 0.12124 | 1.00000 | 0.12124 | 1.00000 |
| foreground w | 0.12124 | 1.00000 | 1.00000 | 1.00000 |

lnL0 = -17085.861311  
lnL = -16542.107635

**Control4 A8LII\_III**  
**foreground A8LII\_III**

dN/dS (w) for site classes (K=4)

| site class   | 0       | 1       | 2a      | 2b      |
|--------------|---------|---------|---------|---------|
| proportion   | 0.78944 | 0.09322 | 0.10495 | 0.01239 |
| background w | 0.11199 | 1.00000 | 0.11199 | 1.00000 |
| foreground w | 0.11199 | 1.00000 | 1.00000 | 1.00000 |

lnL0 = -17081.346438  
lnL = -16518.814503

**Test2 w0 w1 w2 (A9) M2A model=2 NSites=2**  
**foreground w2 A9**

dN/dS (w) for site classes (K=4)

| site class   | 0       | 1       | 2a      | 2b      |
|--------------|---------|---------|---------|---------|
| proportion   | 0.77134 | 0.11445 | 0.09945 | 0.01476 |
| background w | 0.11295 | 1.00000 | 0.11295 | 1.00000 |
| foreground w | 0.11295 | 1.00000 | 1.00000 | 1.00000 |

lnL0 = -17080.625929  
lnL = -16526.841641

**Test3 w0 w1 w2 (A8LI) M2A model=2 NSites=2**  
**foreground w2 A8LI**

dN/dS (w) for site classes (K=4)

| site class   | 0       | 1       | 2a      | 2b      |
|--------------|---------|---------|---------|---------|
| proportion   | 0.86658 | 0.13060 | 0.00245 | 0.00037 |
| background w | 0.12121 | 1.00000 | 0.12121 | 1.00000 |
| foreground w | 0.12121 | 1.00000 | 1.76221 | 1.76221 |

lnL0 = -17101.191579  
lnL = -16542.030475

**Test4 w0 w1 w2 (A8LII\_III) M2A model=2 NSites=2**  
**foreground w2 A8LII\_III**

dN/dS (w) for site classes (K=4)

| site class   | 0       | 1       | 2a      | 2b      |
|--------------|---------|---------|---------|---------|
| proportion   | 0.78944 | 0.09322 | 0.10495 | 0.01239 |
| background w | 0.11199 | 1.00000 | 0.11199 | 1.00000 |
| foreground w | 0.11199 | 1.00000 | 1.00000 | 1.00000 |

lnL0 = -17095.520560  
lnL = -16518.814503

-----

**FitModel**

*Whole Alignment (560 codons (total number) used in the analysis):*

**Control: no Switch**

Model of codon substitution : M2a

Discrete gamma model : No

Transition/transversion ratio : 1.932

. p1 = 0.817649  
. p2 = 0.181120  
. p3 = 0.001232  
. w1 = 0.126670  
. w2 = 1.000000  
. w3 = 2.589530

. log likelihood = -19047.687394

**Model MX+S1**

. p0 = 0.804251 | w0 = 0.038332  
. p1 = 0.192648 | w1 = 1.000011  
. p2 = 0.003101 | w2 = 3.476046  
. delta = 0.340398  
. R01 = 1.077012  
. R02 = 1.077012  
. R12 = 1.077012

site 175 0.164118 0.522028 0.313854

. log likelihood = -18853.123769

**Model M2a+S1**

. p0 = 0.579960 | w0 = 0.012966  
. p1 = 0.340699 | w1 = 0.323848  
. p2 = 0.079341 | w2 = 1.000000  
. delta = 0.229046  
. R01 = 0.423160  
. R02 = 0.423160  
. R12 = 0.423160

. log likelihood = -18800.812959

-----  
*GBlocks (404 codons used in the analysis):*

## **PAML**

### **Branch Model:**

**Test3:**

| model=2 NSites=0        | wb      | wf1 (A3) | wf2 (A8) | wf3 (A9) |
|-------------------------|---------|----------|----------|----------|
| w (dN/dS) for branches: | 0.17346 | 0.06961  | 0.16170  | 0.19354  |
| lnL0 = -15431.232690    |         |          |          |          |
| lnL = -13993.596314     |         |          |          |          |

**Test4:**

| model=2 NSites=0        | wb      | wf1 (A3) | wf2 (A8LI+A9) | wf3 (A8LII_III) |
|-------------------------|---------|----------|---------------|-----------------|
| w (dN/dS) for branches: | 0.20678 | 0.06967  | 0.13830       | 0.18354         |
| lnL0 = -15435.764285    |         |          |               |                 |
| lnL = -13989.488925     |         |          |               |                 |

**Test5:**

**model=2 NSites=0**                      **wb**    **wf1 (A3)**    **wf2 (A8LI)** **wf3 (A9)** **wf4**  
**(A8LII\_III)**  
w (dN/dS) for branches: 0.20410 0.06964 0.09470 0.19127 0.18398  
lnL0 = -15443.201435  
lnL = -13981.433644

-----

**Clade Model:**

**Control:**

**M1A from site model model=0 NSites=1**

dN/dS (w) for site classes (K=2)

p: 0.90770 0.09230  
    **w0**            **w1**  
w: 0.11159 1.00000

lnL0 = -14971.352051  
lnL = -13969.865682

**Test3 w0 w1 w2 (A8) w3 (A9)    model=3 NSites=2**

dN/dS (w) for site classes (K=3)

|                |           |         |                |
|----------------|-----------|---------|----------------|
| site class     | 0         | 1       | 2              |
| proportion     | 0.55421   | 0.00542 | 0.44036        |
|                | <b>w0</b> |         | <b>w1</b>      |
| branch type 0: | 0.03094   | 1.00000 | 0.18957        |
|                | <b>w0</b> |         | <b>w2 (A8)</b> |
| branch type 1: | 0.03094   | 1.00000 | 0.33602        |
|                | <b>w0</b> |         | <b>w3 (A9)</b> |
| branch type 2: | 0.03094   | 1.00000 | 0.37812        |

lnL0 = -14791.066150  
lnL = -13804.848420

**Test6 w0 w1 w2 (A8LI+A9) w3 (A8LII\_III)    model=3 NSites=2**

dN/dS (w) for site classes (K=3)

|                |           |         |                       |
|----------------|-----------|---------|-----------------------|
| site class     | 0         | 1       | 2                     |
| proportion     | 0.56392   | 0.00606 | 0.43001               |
|                | <b>w0</b> |         | <b>w1</b>             |
| branch type 0: | 0.03305   | 1.00000 | 0.21432               |
|                | <b>w0</b> |         | <b>w2 (A8LI+A9)</b>   |
| branch type 1: | 0.03305   | 1.00000 | 0.28014               |
|                | <b>w0</b> |         | <b>w3 (A8LII_III)</b> |
| branch type 2: | 0.03305   | 1.00000 | 0.39100               |

lnL0 = -14791.113850  
lnL = -13811.823912

**Test5 w0 w1 w2 (A8LI) w3 (A9) w4 (A8LII\_III)    model=3 NSites=2**

dN/dS (w) for site classes (K=3)

|                |           |         |           |
|----------------|-----------|---------|-----------|
| site class     | 0         | 1       | 2         |
| proportion     | 0.53593   | 0.00737 | 0.45671   |
|                | <b>w0</b> |         | <b>w1</b> |
| branch type 0: | 0.02911   | 1.00000 | 0.20469   |

|                |           |         |                       |
|----------------|-----------|---------|-----------------------|
|                | <b>w0</b> |         | <b>w2 (A8LI)</b>      |
| branch type 1: | 0.02911   | 1.00000 | 0.18242               |
|                | <b>w0</b> |         | <b>w3 (A9)</b>        |
| branch type 2: | 0.02911   | 1.00000 | 0.37956               |
|                | <b>w0</b> |         | <b>w4 (A8LII_III)</b> |
| branch type 3: | 0.02911   | 1.00000 | 0.36920               |

lnL0 = -14793.704778

lnL = -13805.066656

-----

**Branch Site**

**Control: w0 w1 w2=1 M2A model=2 NSites=2 fixed omega=1**

**Control2 A9  
foreground A9**

dN/dS (w) for site classes (K=4)

|              |         |         |         |         |
|--------------|---------|---------|---------|---------|
| site class   | 0       | 1       | 2a      | 2b      |
| proportion   | 0.83975 | 0.08152 | 0.07176 | 0.00697 |
| background w | 0.10592 | 1.00000 | 0.10592 | 1.00000 |
| foreground w | 0.10592 | 1.00000 | 1.00000 | 1.00000 |

lnL0 = -14623.994095

lnL = -13960.190829

**Control3 A8LI  
foreground A8LI**

dN/dS (w) for site classes (K=4)

|              |         |         |         |         |
|--------------|---------|---------|---------|---------|
| site class   | 0       | 1       | 2a      | 2b      |
| proportion   | 0.90310 | 0.08912 | 0.00708 | 0.00070 |
| background w | 0.11121 | 1.00000 | 0.11121 | 1.00000 |
| foreground w | 0.11121 | 1.00000 | 1.00000 | 1.00000 |

lnL0 = -14633.749979

lnL = -13969.622551

**Control4 A8LII\_III  
foreground A8LII\_III**

dN/dS (w) for site classes (K=4)

|              |         |         |         |         |
|--------------|---------|---------|---------|---------|
| site class   | 0       | 1       | 2a      | 2b      |
| proportion   | 0.82254 | 0.05949 | 0.11001 | 0.00796 |
| background w | 0.10172 | 1.00000 | 0.10172 | 1.00000 |
| foreground w | 0.10172 | 1.00000 | 1.00000 | 1.00000 |

lnL0 = -14633.316635

lnL = -13945.999147

**Test2 w0 w1 w2 (A9) M2A model=2 NSites=2  
foreground w2 (A9)**

dN/dS (w) for site classes (K=4)

|              |         |         |         |         |
|--------------|---------|---------|---------|---------|
| site class   | 0       | 1       | 2a      | 2b      |
| proportion   | 0.83975 | 0.08152 | 0.07176 | 0.00697 |
| background w | 0.10592 | 1.00000 | 0.10592 | 1.00000 |

foreground w 0.10592 1.00000 1.00000 1.00000

lnL0 = -14634.076941

lnL = -13960.190829

**Test3 w0 w1 w2 (A8LI) M2A model=2 NSites=2  
foreground w2 (A8LI)**

dN/dS (w) for site classes (K=4)

| site class   | 0       | 1       | 2a      | 2b      |
|--------------|---------|---------|---------|---------|
| proportion   | 0.90506 | 0.08868 | 0.00570 | 0.00056 |
| background w | 0.11127 | 1.00000 | 0.11127 | 1.00000 |
| foreground w | 0.11127 | 1.00000 | 1.68871 | 1.68871 |

lnL0 = -14647.575174

lnL = -13969.445402

**Test4 w0 w1 w2 (A8LII\_III) M2A model=2 NSites=2  
foreground w2 (A8LII\_III)**

dN/dS (w) for site classes (K=4)

| site class   | 0       | 1       | 2a      | 2b      |
|--------------|---------|---------|---------|---------|
| proportion   | 0.82254 | 0.05949 | 0.11001 | 0.00796 |
| background w | 0.10172 | 1.00000 | 0.10172 | 1.00000 |
| foreground w | 0.10172 | 1.00000 | 1.00000 | 1.00000 |

lnL0 = -14649.242961

lnL = -13945.999147

-----

**GBlocks (404 codons used in the analysis)**

**FitModel**

**Control: M2a no Switch**

Model of codon substitution : M2a

Discrete gamma model : No

. Transition/transversion ratio : 1.773

. p1 = 0.557537

. p2 = 0.431086

. p3 = 0.011377

. w1 = 0.034028

. w2 = 0.267033

. w3 = 1.000000

. log likelihood = -13889.656315

**Model MX+S1**

. p0 = 0.856367 | w0 = 0.031257

. p1 = 0.143590 | w1 = 1.000016

. p2 = 0.000043 | w2 = 1.500024

. delta = 0.405631

. R01 = 1.648789

. R02 = 1.648789

. R12 = 1.648789

. log likelihood = -13884.569083

**Model M2a+S1**

. p0 = 0.655803 | w0 = 0.012682  
. p1 = 0.311965 | w1 = 0.334046  
. p2 = 0.032232 | w2 = 1.000000  
. delta = 0.256107  
. R01 = 0.543104  
. R02 = 0.543104  
. R12 = 0.543104

. log likelihood = -13841.693963

-----
